# Supplementary material
Source: PubMed Central journal article supplement (PMC2782245)
Supplement: cwp136_1.pdf [file cwp136_1.pdf]

**Supplementary Table.** The genome-wide RNAi screen resulted in 512 genes that are hypersensitive to tunicamycin. The *C. elegans* gene sequence name and gene name are given. As mentioned in the Materials and Methods section, the effects of RNAi penetrance and expressivity were measured. The values below (Exp and Pen) are the difference between drug treated scores from non-drug treated scores. Additionally, the presence of *N*-glycosylation sites and cellular location were predicted as stated in the Discussion section. Short descriptions, when available, were also provided.

| Sequence Name | CGC Name | Exp | Pen | NetNGlyc | Predicted Location | Description                                                                          |
|---------------|----------|-----|-----|----------|--------------------|--------------------------------------------------------------------------------------|
| AC8.6         |          | 10  | 20  | No       |                    | <i>no predicted function</i>                                                         |
| AH10.1        |          | 10  | 30  | No       | cytoplasm          | AMP-dependent synthetase and ligase                                                  |
| B0035.11      |          | 25  | -5  | No       | nucleus            | yeast LEO1 protein like                                                              |
| B0035.16      |          | 0   | 20  | No       | cytoplasm          | tRNA methyl transferase                                                              |
| B0035.8       | his-48   | 10  | 20  | No       | nucleus            | H2B histone                                                                          |
| B0205.6       |          | 25  | 5   | No       |                    | aminotransferase                                                                     |
| B0280.5       | cpg-2    | 0   | 20  | No       | extracellular      | protein with six chitin-binding peritrophin-A domains and three mucin-like regions   |
| B0284.1       |          | 30  | 30  | No       | cytoplasm          | <i>no predicted function</i>                                                         |
| B0285.1       |          | 0   | 20  | No       | nucleus            | serine/threonine kinase                                                              |
| B0285.9       | ckb-2    | 5   | 15  | No       | cytoplasm          | encodes an isoform of choline kinase                                                 |
| B0302.4       |          | 0   | 20  | No       |                    | <i>no predicted function</i>                                                         |
| B0334.4       |          | 20  | 15  | No       |                    | protein similar to predicted member of the intramitochondrial sorting protein family |
| B0361.9       |          | 25  | 25  | Yes      | extracellular      | <i>no predicted function</i>                                                         |
| B0365.3       | eat-6    | 20  | 30  | No       | ER                 | ortholog of the alpha subunit of a sodium/potassium ATPase                           |
| B0391.5       | fbxa-153 | 20  | 30  | No       | cytoplasm          | F-box protein                                                                        |
| B0412.1       | dac-1    | 20  | 20  | No       | extracellular      | yeast NUD1 protein                                                                   |
| B0464.1       | drs-1    | 30  | 35  | No       | cytoplasm          | putative aspartyl(D) tRNA synthetase                                                 |
| B0464.4       | bre-3    | 10  | 25  | No       | plasma membrane    | Glycosphingolipid beta-1,4-mannosyltransferase                                       |
| B0464.7       | baf-1    | 10  | 20  | No       | nucleus            | novel protein that binds double-stranded DNA nonspecifically                         |
| B0491.5       |          | 0   | 30  | No       |                    | <i>no predicted function</i>                                                         |
| B0545.1       | tpa-1    | 20  | 20  | Yes      | cytoplasm          | serine/threonine protein kinase                                                      |
| C01F1.2       |          | 0   | 20  | No       | mitochondrion      | orthologous to the human gene SCO (CYTOCHROME OXIDASE DEFICIENT YEAST)               |
| C01G10.6      |          | 10  | 20  | No       |                    | <i>no predicted function</i>                                                         |
| C01G5.5       |          | 0   | 15  | Yes      | cytoplasm          | aldehyde reductase                                                                   |

|          |          |    |    |     |                 |                                                                                              |
|----------|----------|----|----|-----|-----------------|----------------------------------------------------------------------------------------------|
| C01G8.6  |          | 35 | 15 | Yes | extracellular   | <i>no predicted function</i>                                                                 |
| C01H6.9  |          | 30 | 25 | No  | cytoplasm       | homolog of haploid germ cell-specific nuclear protein kinase                                 |
| C02B10.2 |          | 20 | 20 | Yes |                 | orthologous to Yeast Kinetochores-associated protein required chromosome segregation         |
| C04C3.3  |          | 0  | 30 | No  |                 | pyruvate dehydrogenase                                                                       |
| C04G2.2  |          | 0  | 20 | No  | cytoplasm       | serine/threonine protein kinase                                                              |
| C04H5.6  | mog-4    | 20 | 15 | No  | nucleus         | encodes a DEAH helicase                                                                      |
| C05D9.1  | snx-1    | 30 | 30 | No  | cytoplasm       | membrane coat complex Retromer and related PX domain-containing proteins                     |
| C06A1.3  |          | 10 | 20 | No  | cytoplasm       | serine/threonine protein phosphatase                                                         |
| C06A8.4  | skr-17   | 10 | 15 | No  | nucleus         | homolog of Skp1 in <i>S. cerevisiae</i> , a core component of the SCF (Skp1p, Cullin, F-box) |
| C06A8.5  | spdl-1   | 20 | 20 | No  | cytoplasm       | <i>no predicted function</i>                                                                 |
| C06C3.1  | mel-11   | 10 | 25 | No  | cytoplasm       | ortholog of the vertebrate smooth muscle myosin-associated phosphatase regulatory subunit    |
| C06C6.7  |          | 10 | 20 | No  | ER              | <i>no predicted function</i>                                                                 |
| C06E1.4  | glr-1    | 10 | 30 | No  | plasma membrane | encodes an AMPA (non-NMDA)-type ionotropic glutamate receptor subunit                        |
| C06E4.6  |          | 0  | 15 | No  | peroxisome      | dehydrogenase                                                                                |
| C06H2.4  | folt-1   | 10 | 20 | No  | plasma membrane | encodes a folate transporter required for folate uptake                                      |
| C06H5.7  |          | 10 | 20 | No  | plasma membrane | <i>no predicted function</i>                                                                 |
| C07E3.2  | pro-2    | 10 | 20 | No  | nucleus         | yeast ortholog of Noc2p required for intranuclear ribosome maturation and transport          |
| C07G1.2  |          | 20 | 5  | Yes | extracellular   | LDL-receptor domain protein                                                                  |
| C08H9.2  |          | 10 | 35 | No  | nucleus         | high-density lipoprotein-binding protein                                                     |
| C08H9.3  |          | 10 | 20 | No  | ER              | alpha-1,3-glucosyltransferase - homolog of yeast alg8                                        |
| C09D4.5  | rpl-19   | 10 | 30 | No  | cytoplasm       | large ribosomal L19 protein                                                                  |
| C09H10.2 | rpl-41   | 10 | 15 | No  | cytoplasm       | large ribosomal subunit L41 protein                                                          |
| C10G11.5 | pnk-1    | 0  | 20 | No  | cytoplasm       | <i>no predicted function</i>                                                                 |
| C11E4.1  |          | 20 | 30 | No  | extracellular   | glutathione peroxidase                                                                       |
| C12D5.2  | ahr-152  | 0  | 15 | No  |                 | zinc finger protein                                                                          |
| C13B7.4  | srd-71   | 0  | 30 | Yes | plasma membrane | 7TM chemoreceptor, srd family                                                                |
| C14A4.3  |          | 10 | 20 | No  | ER              | alpha-1,2-mannosyltransferase                                                                |
| C14A4.5  | crn-5    | 0  | 20 | No  | nucleus         | ribonuclease                                                                                 |
| C14B9.1  | hsp-12.2 | 20 | 25 | No  | cytoplasm       | small heat-shock protein that forms with HSP-12.3 and has no chaperone-like activity         |
| C16C10.6 | ccdc-55  | 20 | 0  | No  | nucleus         | <i>no predicted function</i>                                                                 |
| C16C10.9 |          | 10 | 20 | No  |                 | <i>no predicted function</i>                                                                 |
| C16C8.11 |          | 20 | 20 | No  |                 | ubiquitin and ubiquitin-like protein                                                         |

|           |         |    |    |     |                 |                                                                                                |
|-----------|---------|----|----|-----|-----------------|------------------------------------------------------------------------------------------------|
| C17A2.8   | nhr-72  | 20 | 20 | No  | nucleus         | zinc finger protein                                                                            |
| C17C3.11  |         | 10 | 20 | No  | cytoplasm       | <i>no predicted function</i>                                                                   |
| C17D12.2  | unc-75  | 0  | 30 | No  | nucleus         | encodes an RNA-binding protein with two N-terminal RNA recognition motifs                      |
| C17H12.1  | dyci-1  | 25 | 15 | No  | cytoplasm       | <i>no predicted function</i>                                                                   |
| C17H12.14 | vha-8   | 0  | 25 | No  | mitochondrion   | ortholog of subunit E of vacuolar proton-translocating ATPase (V-ATPase)                       |
| C18A11.2  |         | 0  | 20 | No  |                 | <i>no predicted function</i>                                                                   |
| C18F10.8  | srg-7   | 30 | 35 | No  | plasma membrane | receptor-like protein, Srg family                                                              |
| C23G10.4  | rpn-2   | 30 | 0  | Yes | cytoplasm       | subunit of the 26S proteasome which functions in ubiquitin moieties in protein degradation     |
| C24B5.2   | spas-1  | 30 | 30 | Yes | nucleus         | Integral membrane ankyrin-repeat protein Kidins220 (protein kinase D substrate)                |
| C24F3.2   |         | 25 | 25 | No  | cytoplasm       | dual specificity phosphatase                                                                   |
| C24H11.4  | srd-74  | 35 | 35 | No  | plasma membrane | chemoreceptor/7TM receptor                                                                     |
| C25A1.13  |         | 0  | 20 | No  | mitochondrion   | NADH-ubiquinone oxidoreductase B8 subunit                                                      |
| C25A1.8   | clec-87 | 10 | 20 | Yes | Golgi           | C-type lectin                                                                                  |
| C25A1.9   |         | 10 | 35 | No  | cytoplasm       | <i>no predicted function</i>                                                                   |
| C26D10.2  | hel-1   | 10 | 30 | No  | nucleus         | ortholog of human 56-kD U2AF65 associated protein                                              |
| C26D10.5  | eff-1   | 30 | 35 | Yes |                 | encodes a type I transmembrane glycoprotein                                                    |
| C26E6.6   |         | 30 | 10 | No  | mitochondrion   | ribosomal protein L3                                                                           |
| C26E6.7   |         | 0  | 25 | No  |                 | <i>no predicted function</i>                                                                   |
| C27D8.2   |         | 20 | 20 | Yes | nucleus         | yeast ortholog involved in protein transport, necessary for protein transport from ER to Golgi |
| C27H5.5   | col-36  | 20 | 20 | No  | extracellular   | collagen protein                                                                               |
| C30G12.2  |         | 10 | 25 | No  | ER              | predicted short chain-type dehydrogenase                                                       |
| C30G12.7  | puf-8   | 20 | 20 | Yes | cytoplasm       | translational repressor Pumilio/PUF3 and related RNA-binding proteins                          |
| C30H6.3   | clec-21 | 0  | 20 | No  | extracellular   | <i>no predicted function</i>                                                                   |
| C32D5.2   | sma-6   | 10 | 20 | Yes | cytoplasm       | serine/threonine protein kinase                                                                |
| C32E8.5   |         | 0  | 20 | No  | nucleus         | transcriptional regulator SNIP1, contains FHA domain                                           |
| C32F10.1  | obr-4   | 0  | 20 | No  | cytoplasm       | oxysterol-binding protein                                                                      |
| C33A12.13 | sru-2   | 5  | 15 | Yes | plasma membrane | <i>no predicted function</i>                                                                   |
| C33F10.2  |         | 5  | 35 | No  | cytoplasm       | cell division control protein                                                                  |
| C33F10.4  |         | 0  | 30 | Yes |                 | serine/threonine kinase TIP30/CC3                                                              |
| C34B2.10  |         |    | 30 | No  | ER              | <i>no predicted function</i>                                                                   |
| C34E10.6  | atp-2   | 0  | 30 | No  | mitochondrion   | beta subunit of the soluble, catalytic F1 portion of ATP synthase                              |
| C34E11.1  | rsd-3   | 15 | 5  | Yes | extracellular   | <i>no predicted function</i>                                                                   |

|           |         |    |    |     |                 |                                                                                          |
|-----------|---------|----|----|-----|-----------------|------------------------------------------------------------------------------------------|
| C35B1.1   | ubc-1   | 0  | 30 | No  | nucleus         | E2 ubiquitin-conjugating enzyme                                                          |
| C35B8.2   | vav-1   | 0  | 20 | No  | cytoplasm       | <i>no predicted function</i>                                                             |
| C35D10.13 |         | 15 | 15 | No  |                 | <i>no predicted function</i>                                                             |
| C35D10.2  |         | 10 | 20 | No  |                 | <i>no predicted function</i>                                                             |
| C35D6.4   |         | 0  | 30 | Yes | nucleus         | CCCH-type Zn-finger protein                                                              |
| C36B1.4   | pas-4   | -5 | 15 | No  | nucleus         | 20S proteasome                                                                           |
| C37C3.6   | ppn-1   | 15 | -5 | No  | extracellular   | encodes three isoforms of a large, novel multidomain glycoprotein                        |
| C37H5.1   | nex-4   | 5  | 15 | No  | plasma membrane | encodes a predicted annexin.                                                             |
| C41C4.4   | ire-1   | 0  | 20 | No  | cytoplasm       | transmembrane serine/threonine protein kinase required for the unfolded protein response |
| C42C1.14  | rpl-34  | 15 | 25 | No  | cytoplasm       | large ribosomal subunit L34 protein that affects growth and body coloration              |
| C43E11.7  | ndx-7   | 10 | 30 | No  | cytoplasm       | NUDIX hydrolase predicted to function as a pyrophosphatase                               |
| C46E10.7  | srh-99  | 10 | 20 | No  |                 | 7TM chemoreceptor                                                                        |
| C47A4.5   |         | 0  | 20 | No  | nucleus         | <i>no predicted function</i>                                                             |
| C47B2.6   | gale-1  | 20 | 20 | No  |                 | UDP-glucose 4-epimerase/UDP-sulfoquinovose synthase                                      |
| C47D12.8  |         | 30 | 30 | No  | nucleus         | ortholog to the human gene DNA Repair Protein                                            |
| C47E12.4  | pyp-1   | 0  | 35 | No  | cytoplasm       | inorganic pyrophosphatase                                                                |
| C47E12.7  |         | 20 | 20 | No  | nucleus         | nucleolar protein NOP52/RRP1                                                             |
| C48D5.1   | nhr-6   | 25 | 25 | Yes | nucleus         | nuclear receptor of the NR4A4 subfamily                                                  |
| C48E7.2   |         | 10 | 30 | No  |                 | <i>no predicted function</i>                                                             |
| C49A9.6   |         | 10 | 15 | No  |                 | <i>no predicted function</i>                                                             |
| C49H3.11  | rps-2   | 10 | 20 | No  | cytoplasm       | small ribosomal subunit S2 protein                                                       |
| C49H3.4   |         | 10 | 20 | No  |                 | like-Sm ribonucleoprotein                                                                |
| C49H3.8   |         | 20 | 30 | No  | cytoplasm       | heat shock protein 70                                                                    |
| C50A2.3   |         | 30 | 30 | No  |                 | <i>no predicted function</i>                                                             |
| C50B6.2   | nasp-2  | 15 | 15 | No  | nucleus         | histone binding protein                                                                  |
| C50F7.4   |         | 5  | 25 | No  | mitochondrion   | succinyl-CoA synthetase beta chain                                                       |
| C52D10.13 | col-138 | 0  | 20 | No  | extracellular   | cuticular collagen                                                                       |
| C52D10.2  |         | 10 | 20 | No  |                 | <i>no predicted function</i>                                                             |
| C52E4.3   | snr-4   | 10 | 15 | No  | nucleus         | small nuclear ribonucleoprotein                                                          |
| C53D5.6   | imb-3   | 0  | 25 | No  | cytoplasm       | nuclear transport factor that regulates nuclear import of ribosomal proteins             |
| C53H9.1   | rpl-27  | 0  | 20 | No  | cytoplasm       | large ribosomal subunit L27 protein.                                                     |
| C53H9.2   |         | 30 | 30 | No  | cytoplasm       | small ribosomal subunit S2 protein                                                       |

|          |         |     |    |     |                 |                                                                                             |
|----------|---------|-----|----|-----|-----------------|---------------------------------------------------------------------------------------------|
| C54G4.1  |         | 10  | 20 | No  | cytoplasm       | <i>no predicted function</i>                                                                |
| C55A6.7  |         | 0   | 30 | No  | cytoplasm       | alcohol dehydrogenase                                                                       |
| C56C10.6 |         | 0   | 20 | No  |                 | casein kinase                                                                               |
| C56C10.8 | icd-1   | 0   | 25 | No  | nucleus         | ortholog of the beta-subunit of the nascent polypeptide-associated complex (betaNAC)        |
| C56C10.9 |         | 15  | 15 | Yes |                 | <i>no predicted function</i>                                                                |
| D1007.1  | ceh-17  | 0   | 20 | No  | nucleus         | phox-2-like homeodomain protein                                                             |
| D1007.13 |         | 20  | 20 | No  | nucleus         | <i>no predicted function</i>                                                                |
| D1009.2  | cyn-8   | 20  | 20 | Yes | cytoplasm       | peptidyl-propyl cis-trans isomerase of the cyclophilin family implicated in protein folding |
| D1081.7  |         | 10  | 25 | No  |                 | <i>no predicted function</i>                                                                |
| D2021.8  |         | -10 | 20 | Yes | cytoplasm       | ankyrin repeat and DHHC-type Zn-finger domain containing proteins                           |
| D2024.3  | elo-3   | -10 | 25 | No  | ER              | paralog of elo-1 and elo-2, which encodes a polyunsaturated fatty acid (PUFA) elongase      |
| D2030.10 | aex-1   | 20  | 20 | No  |                 | novel C2 domain protein; C2 is a proposed calcium binding domain                            |
| D2030.3  |         | 0   | 20 | Yes | nucleus         | <i>no predicted function</i>                                                                |
| DY3.1    | tin-13  | 0   | 20 | No  | mitochondrion   | <i>no predicted function</i>                                                                |
| E01G4.2  |         | 0   | 30 | No  |                 | <i>no predicted function</i>                                                                |
| E02A10.1 |         | 15  | 15 | Yes | mitochondrion   | mitochondrial 40S ribosomal protein S5                                                      |
| E04A4.4  | hoe-1   | 10  | 20 | Yes | cytoplasm       | ortholog to human ELAC2 associated with prostate cancer                                     |
| E04F6.9  |         | 0   | 30 | No  |                 | <i>no predicted function</i>                                                                |
| F01D4.3  |         | 0   | 20 | No  | cytoplasm       | SH2 domain tyrosine protein kinase (FFES/FPS subfamily)                                     |
| F01D5.5  |         | 0   | 20 | No  | extracellular   | <i>no predicted function</i>                                                                |
| F02A9.3  | far-2   | 20  | 20 | No  |                 | encodes a protein similar to a class of secreted fatty acid and retinol-binding proteins    |
| F02D10.5 | flr-1   | 15  | 15 | Yes | plasma membrane | sodium channel like                                                                         |
| F02E8.1  | asb-2   | 20  | 30 | No  | mitochondrion   | ATP synthase B homolog                                                                      |
| F07A5.7  | unc-15  | 0   | 20 | No  | cytoplasm       | paramyosin ortholog that interacts with MHC A, one isoform of myosin heavy chain (MHC)      |
| F07E5.2  | fbxb-35 | 0   | 15 | Yes |                 | protein containing an F-box, a motif predicted to mediate protein-protein interactions      |
| F07H5.6  |         | 20  | 10 | No  | nucleus         | <i>no predicted function</i>                                                                |
| F08B4.5  |         | 10  | 20 | No  | nucleus         | <i>no predicted function</i>                                                                |
| F08C6.2  |         | 0   | 25 | No  | ER              | <i>no predicted function</i>                                                                |
| F08F3.3  | rhr-1   | 30  | 30 | No  | plasma membrane | ortholog of human Rhesus Blood-group associated glycoprotein                                |
| F08G12.1 |         | 5   | 15 | No  | cytoplasm       | ras-related like protein                                                                    |
| F09E5.1  | pkc-3   | 15  | 15 | Yes | cytoplasm       | protein kinase C                                                                            |
| F09G8.3  |         | 30  | -5 | Yes | mitochondrion   | Mitochondrial ribosomal protein S9                                                          |

|           |          |    |    |     |                 |                                                                                 |
|-----------|----------|----|----|-----|-----------------|---------------------------------------------------------------------------------|
| F10C2.6   | drs-2    | 0  | 20 | No  | cytoplasm       | putative aspartyl-tRNA synthetase                                               |
| F10D11.1  | sod-2    | 20 | 20 | No  | mitochondrion   | iron/manganese superoxide dismutase                                             |
| F10E9.4   |          | 20 | 20 | No  | nucleus         | <i>no predicted function</i>                                                    |
| F10G7.11  | ttr-41   | 0  | 30 | No  |                 | <i>no predicted function</i>                                                    |
| F11A10.1  |          | 10 | 20 | No  | cytoplasm       | TAT-binding homolog like                                                        |
| F11A3.2   |          | 10 | 20 | No  | cytoplasm       | <i>no predicted function</i>                                                    |
| F11A5.10  | glc-1    | 20 | 20 | Yes | plasma membrane | encodes an alpha subunit of a glutamate-gated chloride channel                  |
| F11C1.2   |          | 15 | 15 | No  |                 | <i>no predicted function</i>                                                    |
| F11C1.3   |          | 10 | 20 | No  | lysosome        | membrane glycoprotein                                                           |
| F12B6.3   | lgc-51   | 0  | 30 | Yes | plasma membrane | Integral membrane ankyrin-repeat protein Kidins220 (protein kinase D substrate) |
| F14E5.5   | lips-10  | 20 | 30 | No  |                 | triacylglycerol lipase                                                          |
| F16B12.6  |          | 0  | 20 | No  |                 | <i>no predicted function</i>                                                    |
| F16G10.6  |          | 10 | 20 | No  |                 | <i>no predicted function</i>                                                    |
| F16H6.2   | clcc-246 | 0  | 15 | No  | Golgi           | C-type lectin domain                                                            |
| F19B6.2   | ufd-1    | 20 | 20 | Yes | cytoplasm       | ubiquitin fusion-degradation protein                                            |
| F20D6.8   |          | 20 | 10 | No  | plasma membrane | RAS-like protein                                                                |
| F20H11.6  |          | 10 | 20 | No  | extracellular   | <i>no predicted function</i>                                                    |
| F21D12.1  | nhr-21   | 0  | 15 | No  | nucleus         | modulating N-terminal of steroid/thyroid/retinoic nuclear hormone receptors     |
| F21E9.3   | ttr-37   | 20 | 20 | No  | extracellular   | <i>no predicted function</i>                                                    |
| F22B7.1   |          | 20 | 25 | Yes |                 | <i>no predicted function</i>                                                    |
| F22F7.1   |          | 0  | 20 | No  |                 | saccharopine dehydrogenase                                                      |
| F23B12.7  |          | 30 | 0  | No  | nucleus         | CCAAT binding factor 1 protein like                                             |
| F23B12.9  | egl-1    | 10 | 20 | No  |                 | programmed cell death activator                                                 |
| F25B3.6   |          | 10 | 15 | No  | nucleus         | <i>no predicted function</i>                                                    |
| F25B4.6   |          | 30 | 20 | No  | mitochondrion   | hydroxymethylglutaryl-CoA synthase                                              |
| F25C8.4   |          | 0  | 20 | No  | cytoplasm       | AMP-binding enzyme                                                              |
| F25G6.3   | acr-16   | 0  | 20 | No  | plasma membrane | alpha-7-like homomer-forming subunit of the nicotinic acetylcholine receptor    |
| F25H2.9   | pas-5    | 10 | 35 | No  | nucleus         | proteasome zeta chain                                                           |
| F25H5.6   |          | 20 | 0  | No  |                 | <i>no predicted function</i>                                                    |
| F26A1.1   |          | 10 | 35 | No  |                 | <i>no predicted function</i>                                                    |
| F26B1.2   |          | 0  | 20 | No  | nucleus         | RNA-binding protein                                                             |
| F26D11.11 | let-413  | 0  | 20 | No  |                 | encodes a protein that is required for the assembly of adherens junctions       |

|           |          |    |    |     |                 |                                                                                              |
|-----------|----------|----|----|-----|-----------------|----------------------------------------------------------------------------------------------|
| F26E4.9   | cco-1    | 30 | 20 | No  | mitochondrion   | cytochrome c oxidase, subunit Vb/COX4                                                        |
| F26F2.6   | clec-263 | 0  | 30 | Yes |                 | cysteine rich C-type lectin                                                                  |
| F26F4.10  | rrt-1    | 0  | 15 | No  | cytoplasm       | arginyl-tRNA synthetase that affects embryonic viability and fertility                       |
| F26H11.3  |          | 20 | 20 | No  |                 | <i>no predicted function</i>                                                                 |
| F26H9.6   | rab-5    | 25 | 35 | No  | plasma membrane | rab related protein of the Ras GTPase                                                        |
| F27C8.2   |          | 10 | 20 | No  |                 | <i>no predicted function</i>                                                                 |
| F27D4.2   |          | 0  | 30 | No  | nucleus         | <i>no predicted function</i>                                                                 |
| F27D4.6   |          | 20 | 20 | Yes |                 | zinc-finger protein                                                                          |
| F28A10.3  |          | 0  | 20 | No  |                 | <i>no predicted function</i>                                                                 |
| F28C12.5  | sra-21   | 20 | 30 | Yes | plasma membrane | 7TM chemoreceptor, sra family                                                                |
| F28H6.1   | akt-2    | 20 | 20 | No  | cytoplasm       | homolog of the serine/threonine kinase Akt/PKB                                               |
| F29C12.4  |          | 10 | 35 | No  | mitochondrion   | translation elongation factor EFG/EF2                                                        |
| F29D10.1  |          | 10 | 30 | No  | nucleus         | <i>no predicted function</i>                                                                 |
| F29D10.5  |          | 0  | 20 | No  |                 | <i>no predicted function</i>                                                                 |
| F30A10.3  |          | 10 | 20 | No  | cytoplasm       | Inositol polyphosphate kinase                                                                |
| F31C3.5   |          | 0  | 25 | Yes | nucleus         | GIN5 complex, Psf2 component                                                                 |
| F31C3.6   |          | 20 | 20 | Yes |                 | <i>no predicted function</i>                                                                 |
| F32A11.3  |          | 35 | 35 | No  | nucleus         | <i>no predicted function</i>                                                                 |
| F32D8.6   | emo-1    | 20 | 20 | No  | ER              | ortholog of Sec61p, required for translocation of secreted and membrane proteins into the ER |
| F33D11.10 |          | 25 | 25 | No  |                 | initiation factor/helicase                                                                   |
| F33D11.3  | col-54   | 0  | 20 | No  | extracellular   | N-terminal collagen triple helix repeat                                                      |
| F35G2.3   |          | 0  | 20 | No  | cytoplasm       | <i>no predicted function</i>                                                                 |
| F35H8.3   | zfp-2    | 20 | 20 | No  | nucleus         | zinc finger, C2H2 type                                                                       |
| F36A2.6   | rps-15   | 20 | 20 | No  | cytoplasm       | small ribosomal subunit S15 protein                                                          |
| F36A2.7   |          | 0  | 30 | No  |                 | <i>no predicted function</i>                                                                 |
| F36F2.2   |          | 10 | 20 | No  |                 | <i>no predicted function</i>                                                                 |
| F36H1.2   |          | 10 | 20 | Yes | cytoplasm       | integral membrane ankyrin-repeat protein Kidins220 (protein kinase D substrate)              |
| F36H1.5   |          | 0  | 20 | No  |                 | <i>no predicted function</i>                                                                 |
| F37A8.1   |          | 25 | 25 | No  |                 | <i>no predicted function</i>                                                                 |
| F37B4.7   | folt-2   | 10 | 20 | No  | plasma membrane | encodes a putative folate transporter                                                        |
| F37C12.11 | rps-21   | 0  | 20 | No  | cytoplasm       | small ribosomal subunit S21 protein                                                          |
| F37E3.3   |          | 15 | 35 | No  |                 | protein kinase-like                                                                          |

|           |          |    |    |     |                 |                                                                                               |
|-----------|----------|----|----|-----|-----------------|-----------------------------------------------------------------------------------------------|
| F38A1.6   |          | 0  | 20 | No  |                 | C-type lectin superfamily member                                                              |
| F38A3.2   | ram-2    | 0  | 30 | No  | extracellular   | cuticle collagen that affects ray cell migration                                              |
| F38E1.7   | mom-2    | 10 | 35 | No  | extracellular   | member of the Wnt family of secreted signaling glycoproteins                                  |
| F39E9.5   |          | 5  | 15 | No  |                 | mariner transposase                                                                           |
| F40B1.2   | bath-18  | 20 | 10 | No  | cytoplasm       | <i>no predicted function</i>                                                                  |
| F40G12.11 |          | 20 | 20 | No  |                 | yeast ortholog involved in the translocation of macromolecules between the nucleoplasm        |
| F41C3.8   |          | 20 | 10 | No  |                 | <i>no predicted function</i>                                                                  |
| F41E7.7   |          | 0  | 20 | No  |                 | <i>no predicted function</i>                                                                  |
| F42A10.4  | efk-1    | 0  | 35 | No  | cytoplasm       | calcium/calmodulin-dependent protein kinase                                                   |
| F42A10.5  |          | 15 | 15 | No  |                 | <i>no predicted function</i>                                                                  |
| F42A6.7   | hrp-1    | 10 | 20 | No  | nucleus         | RNA-binding protein                                                                           |
| F42G4.6   |          | 10 | 20 | No  |                 | <i>no predicted function</i>                                                                  |
| F42G8.10  |          | 10 | 20 | No  |                 | <i>no predicted function</i>                                                                  |
| F44A2.1   |          | 20 | 30 | No  | nucleus         | <i>no predicted function</i>                                                                  |
| F44F4.2   | egg-3    | 0  | 20 | No  | extracellular   | protein-tyrosine phosphatase                                                                  |
| F44G3.10  |          | 20 | 10 | No  |                 | claudin homolog required for cohesion of apical junctions in epithelia                        |
| F45E4.11  |          | 20 | 30 | No  | plasma membrane | permease of the major facilitator superfamily                                                 |
| F45E4.7   |          | 10 | 20 | No  | extracellular   | <i>no predicted function</i>                                                                  |
| F46A9.3   | twk-29   | 0  | 15 | Yes |                 | <i>no predicted function</i>                                                                  |
| F46C3.1   | pek-1    | 10 | 20 | No  | ER              | protein kinase orthologous to human eukaryotic translation initiation factor 2-alpha kinase 3 |
| F46E10.9  | dpy-11   | 20 | 25 | No  | ER              | membrane-associated thioredoxin-like (TRX) protein                                            |
| F46F11.4  | ubl-5    | 0  | 30 | Yes |                 | ortholog of the human ubiquitin-like gene UBL5                                                |
| F46F3.4   | ape-1    | 10 | 20 | No  | cytoplasm       | encodes an ortholog of inhibitory p53-interacting protein (iASPP)                             |
| F47B10.8  |          | 20 | 20 | No  |                 | <i>no predicted function</i>                                                                  |
| F47B3.2   |          | 0  | 20 | No  | cytoplasm       | protein tyrosine phosphatase                                                                  |
| F47B7.5   |          | 0  | 15 | No  | nucleus         | <i>no predicted function</i>                                                                  |
| F47G4.2   |          | 20 | 0  | No  | plasma membrane | <i>no predicted function</i>                                                                  |
| F47G9.1   | srf-8    | 10 | 20 | No  | Golgi           | <i>no predicted function</i>                                                                  |
| F47G9.3   |          | 20 | 20 | No  |                 | <i>no predicted function</i>                                                                  |
| F47H4.7   | fbxa-187 | 0  | 20 | No  | cytoplasm       | predicted to mediate protein-protein interactions either with homologs of yeast Skp-1p        |
| F48C1.5   |          | 20 | 35 | No  |                 | <i>no predicted function</i>                                                                  |
| F48E8.5   | paa-1    | 20 | 0  | No  | cytoplasm       | protein phosphatase                                                                           |



|           |          |     |    |     |                 |                                                                                              |
|-----------|----------|-----|----|-----|-----------------|----------------------------------------------------------------------------------------------|
| F49C12.2  |          | 0   | 30 | No  |                 | <i>no predicted function</i>                                                                 |
| F49C12.4  |          | 0   | 30 | No  |                 | <i>no predicted function</i>                                                                 |
| F49C12.5  |          | 0   | 20 | Yes |                 | DUF23 type extracellular protein with conserved cysteines                                    |
| F49C12.8  | rpn-7    | 25  | 35 | No  | cytoplasm       | non-ATPase subunit of the 19S regulatory complex of the proteasome                           |
| F52B11.3  | noah-2   | -10 | 15 | No  |                 | <i>no predicted function</i>                                                                 |
| F52B5.6   | rpl-25.2 | 0   | 15 | No  | cytoplasm       | large ribosomal subunit L23a protein                                                         |
| F52C6.1   | bath-22  | 10  | 20 | No  | cytoplasm       | <i>no predicted function</i>                                                                 |
| F52C6.11  | bath-2   | 25  | 35 | No  | cytoplasm       | <i>no predicted function</i>                                                                 |
| F52E10.5  | ifa-3    | 30  | 10 | Yes | cytoplasm       | coiled intermediate filament protein                                                         |
| F52H2.3   |          | 10  | 20 | No  |                 | <i>no predicted function</i>                                                                 |
| F53A3.3   | rps-22   | 20  | 20 | Yes | cytoplasm       | ribosomal subunit S15a protein                                                               |
| F53C11.7  | swan-2   | 10  | 20 | No  | nucleus         | yeast hypothetical protein YPL247C like                                                      |
| F53G12.10 | rpl-7    | 30  | 30 | No  | cytoplasm       | ribosomal protein L30                                                                        |
| F54C8.4   |          | 15  | 15 | No  | nucleus         | protein-tyrosine phosphatase                                                                 |
| F54C8.5   | rheb-1   | 15  | 15 | No  | plasma membrane | Ras small GTPase                                                                             |
| F54C9.2   | stc-1    | 0   | 20 | No  | ER              | heat shock 70Kd protein                                                                      |
| F54D10.3  |          | 0   | 30 | Yes |                 | <i>no predicted function</i>                                                                 |
| F54D10.6  |          | 10  | 20 | No  |                 | <i>no predicted function</i>                                                                 |
| F54E7.2   | rps-12   | 10  | 20 | No  | cytoplasm       | ribosomal subunit S12 protein                                                                |
| F54E7.5   | sdz-21   | 20  | 20 | No  |                 | <i>no predicted function</i>                                                                 |
| F55A12.3  | ppk-1    | 25  | 35 | No  | cytoplasm       | phosphatidylinositol-4-phosphate 5-kinase                                                    |
| F55D10.2  | rpl-25.1 | 15  | 25 | No  | cytoplasm       | ribosomal protein L23                                                                        |
| F55G11.5  | dod-22   | 0   | 15 | No  |                 | <i>no predicted function</i>                                                                 |
| F55H2.2   | vha-14   | 10  | 30 | No  | mitochondrion   | ortholog of subunit D of the cytoplasmic (V1) domain of vacuolar proton-translocating ATPase |
| F56A12.1  | unc-39   | 0   | 20 | No  | nucleus         | homeodomain transcription factor that belongs to the Six4/5 family                           |
| F56B3.10  | gst-40   | 35  | 35 | No  | cytoplasm       | glutathione S-transferase                                                                    |
| F56E10.1  |          | 0   | 20 | Yes | nucleus         | <i>no predicted function</i>                                                                 |
| F56F10.2  |          | 0   | 20 | No  |                 | <i>no predicted function</i>                                                                 |
| F57B1.2   | sun-1    | 0   | 20 | No  | nucleus         | nuclear envelope receptor for CED-4 during apoptosis, and is bound by CED-4 in vitro         |
| F57B9.6   | inf-1    | 15  | 5  | No  | nucleus         | <i>no predicted function</i>                                                                 |
| F58B4.1   | nas-31   | 0   | 20 | No  |                 | zinc metalloprotease                                                                         |
| F58B4.5   |          | 20  | 20 | No  | ER              | <i>no predicted function</i>                                                                 |

|          |         |     |    |     |                 |                                                                     |
|----------|---------|-----|----|-----|-----------------|---------------------------------------------------------------------|
| F58G1.2  |         | 25  | 25 | No  | nucleus         | zinc finger, C2H2 type                                              |
| F59A1.13 |         | 10  | 20 | No  | plasma membrane | <i>no predicted function</i>                                        |
| F59A1.4  | str-89  | 0   | 20 | No  | plasma membrane | 7-transmembrane olfactory receptor                                  |
| F59A3.3  |         | 20  | 10 | No  |                 | <i>no predicted function</i>                                        |
| F59B2.11 |         | 20  | 20 | Yes | nucleus         | <i>no predicted function</i>                                        |
| F59C6.5  |         | 30  | 5  | No  | mitochondrion   | NADH ubiquinone oxidoreductase                                      |
| F59E10.3 |         | -10 | 15 | No  | Golgi           | subunit of the coatomer (COPI) complex                              |
| H02I12.6 | his-66  | 30  | 20 | No  | nucleus         | H2B histone                                                         |
| H04J21.3 | gip-1   | 10  | 20 | No  |                 | gamma-tubulin-binding protein                                       |
| H06H21.3 |         | 15  | 25 | No  | cytoplasm       | translation initiation factor                                       |
| H12I19.3 | srz-30  | 10  | 35 | No  |                 | <i>no predicted function</i>                                        |
| H13N06.3 | gob-1   | 25  | 25 | Yes |                 | trehalose-6-phosphatase                                             |
| H23N18.4 |         | 10  | 30 | Yes | ER              | UDP-glucuronosyl and UDP-glucosyl transferase                       |
| H39E20.1 |         | 10  | 20 | No  |                 | <i>no predicted function</i>                                        |
| JC8.11   |         | 0   | 20 | No  |                 | <i>no predicted function</i>                                        |
| K01A6.4  |         | 0   | 20 | No  | nucleus         | <i>no predicted function</i>                                        |
| K01C8.6  |         | 30  | 0  | No  | cytoplasm       | <i>no predicted function</i>                                        |
| K01C8.9  | nst-1   | 0   | 30 | No  | nucleus         | encodes a homolog of human FLJ10613 and nucleostemin                |
| K02D10.5 |         | 20  | 20 | No  | plasma membrane | SNAP-25 (synaptosome-associated protein) component of SNARE complex |
| K02D3.1  |         | 0   | 25 | No  |                 | <i>no predicted function</i>                                        |
| K02F2.3  | tag-203 | 25  | 25 | Yes | nucleus         | splicing factor 3b, subunit 3                                       |
| K04A8.10 |         | 30  | 30 | No  | ER              | UDP-glucuronosyltransferase                                         |
| K04G2.1  | iftb-1  | 20  | 20 | No  | cytoplasm       | translational initiation factor 2 beta subunit                      |
| K04G7.11 |         | 20  | 0  | No  | cytoplasm       | <i>no predicted function</i>                                        |
| K05C4.1  | pbs-5   | 35  | 35 | No  | cytoplasm       | 20S proteasome, regulatory subunit beta type PSMB5/PSMB8/PRE2       |
| K06H7.6  | apc-2   | 0   | 20 | No  | cytoplasm       | subunit 2 of APC, a cyclin-specific E3 RING ubiquitin ligase        |
| K06H7.8  |         | 0   | 20 | No  | cytoplasm       | casein kinase (serine/threonine/tyrosine protein kinase)            |
| K07C5.8  | cash-1  | 35  | 35 | No  | cytoplasm       | nuclear autoantigen                                                 |
| K07E8.3  | sdz-24  | 25  | 25 | Yes | nucleus         | single-stranded DNA-binding replication protein A (RPA)             |
| K07H8.1  |         | 10  | 20 | No  | cytoplasm       | <i>no predicted function</i>                                        |
| K08C9.2  |         | 20  | 20 | No  |                 | <i>no predicted function</i>                                        |
| K08E3.1  | tyr-2   | 0   | 20 | No  | extracellular   | tyrosinase                                                          |

|          |        |    |    |     |                 |                                                                                          |
|----------|--------|----|----|-----|-----------------|------------------------------------------------------------------------------------------|
| K08E3.6  | cyk-4  | 0  | 20 | No  | cytoplasm       | GTPase-activator protein for Rho-like GTPases                                            |
| K08E3.7  | pdr-1  | 0  | 20 | No  | nucleus         | E3 ubiquitin-protein ligase                                                              |
| K08F4.5  |        | 5  | 35 | No  | nucleus         | <i>no predicted function</i>                                                             |
| K09A9.5  | gas-1  | 10 | 20 | No  | mitochondrion   | NADH-ubiquinone oxidoreductase 49KD subunit                                              |
| K09D9.11 |        | 0  | 20 | No  | nucleus         | <i>no predicted function</i>                                                             |
| K09E10.2 |        | 10 | 20 | No  | mitochondrion   | integral membrane ankyrin-repeat protein Kidins220 (protein kinase D substrate)          |
| K09E4.2  |        | 10 | 30 | No  | ER              | alpha-1,3-mannosyltransferase                                                            |
| K10C2.2  |        | 25 | 35 | No  |                 | <i>no predicted function</i>                                                             |
| K12H4.3  |        | 15 | 15 | No  | nucleus         | <i>no predicted function</i>                                                             |
| K12H6.2  |        | 20 | 0  | No  |                 | <i>no predicted function</i>                                                             |
| M01A10.5 |        | 0  | 20 | No  |                 | <i>no predicted function</i>                                                             |
| M01E10.2 | dpy-1  | 0  | 35 | Yes | extracellular   | integral membrane ankyrin-repeat protein Kidins220 (protein kinase D substrate)          |
| M03D4.1  | zen-4  | 30 | 25 | No  | Golgi           | kinesin-like protein                                                                     |
| M04G12.3 | gcy-34 | 20 | 20 | No  | cytoplasm       | guanylyl cyclase that is expressed in four sensory neurons connected to the pseudocoelom |
| M110.4   | ifg-1  | 0  | 20 | No  |                 | ortholog of the translational initiation factor eIF4 (eIF-4) gamma                       |
| M117.3   |        | 0  | 20 | No  | cytoplasm       | protein with similarity to the C-terminal half of the 14-3-3 proteins PAR-5 and FTT-2    |
| M88.2    |        | 35 | 5  | Yes | mitochondrion   | mitochondrial ribosomal protein S34                                                      |
| R02C2.3  | tag-40 | 0  | 30 | No  | plasma membrane | <i>no predicted function</i>                                                             |
| R02D3.8  |        | 20 | 20 | No  | extracellular   | exonuclease                                                                              |
| R03A10.4 | knat-3 | 15 | 15 | Yes |                 | gluamine-phenylpyruvate transaminase                                                     |
| R03G5.1  | eft-4  | 0  | 20 | No  | cytoplasm       | elongation factor EF-1-alpha                                                             |
| R04A9.2  |        | 0  | 30 | No  | cytoplasm       | <i>no predicted function</i>                                                             |
| R05H10.2 |        | 30 | 10 | No  | nucleus         | RNA recognition motif                                                                    |
| R06A4.7  | mes-2  | 10 | 20 | No  | nucleus         | ortholog of the Drosophila Polycomb group protein Enhancer of zeste                      |
| R06F6.1  | cdl-1  | 30 | 35 | No  | nucleus         | homolog of human hairpin (stem-loop) binding proteins (HBP/SLBP)                         |
| R07E5.6  |        | 30 | 30 | Yes | Golgi           | <i>no predicted function</i>                                                             |
| R07G3.1  | cdc-42 | 0  | 20 | No  | cytoplasm       | RHO GTPase which controls polarity of both individual cells and developing embryos       |
| R07H5.3  |        | 0  | 20 | No  |                 | <i>no predicted function</i>                                                             |
| R08D7.1  |        | 25 | 35 | No  | nucleus         | <i>no predicted function</i>                                                             |
| R09B3.4  | ubc-12 | 25 | 25 | Yes | cytoplasm       | ubiquitin-conjugating enzyme                                                             |
| R10E4.4  | mcm-5  | 20 | 20 | No  | nucleus         | <i>no predicted function</i>                                                             |
| R10H10.2 | spe-26 | 30 | 30 | No  | cytoplasm       | encodes a Kelch motif-containing protein                                                 |

|          |          |    |    |     |                 |                                                                                     |
|----------|----------|----|----|-----|-----------------|-------------------------------------------------------------------------------------|
| R11A5.2  | nud-2    | 10 | 20 | No  | Golgi           | NUD-2 is required to prevent convulsions induced by exposure to the GABA antagonist |
| R11D1.8  | rpl-28   | 10 | 20 | No  | cytoplasm       | ribosomal subunit L28 protein                                                       |
| R13A1.8  | glb-23   | 0  | 30 | No  | nucleus         | globin                                                                              |
| R13A5.11 |          | 20 | 20 | No  | cytoplasm       | <i>no predicted function</i>                                                        |
| R13A5.8  | rpl-9    | 15 | 15 | Yes | cytoplasm       | ribosomal subunit L9 protein that affects fertility and embryonic viability         |
| T01A4.2  |          | 10 | 20 | Yes | plasma membrane | <i>no predicted function</i>                                                        |
| T01E8.6  |          | 25 | 25 | No  | mitochondrion   | mitochondrial ribosomal protein S14                                                 |
| T04A11.5 |          | 0  | 30 | No  | cytoplasm       | <i>no predicted function</i>                                                        |
| T04A8.14 | emb-5    | 30 | 25 | No  | nucleus         | ortholog of the Spt6 family of RNA polymerase II transcription elongation factors   |
| T04G9.4  |          | 0  | 35 | No  | cytoplasm       | <i>no predicted function</i>                                                        |
| T05B4.9  |          | 0  | 20 | No  | extracellular   | <i>no predicted function</i>                                                        |
| T05E11.7 |          | 35 | 35 | No  | Golgi           | <i>no predicted function</i>                                                        |
| T05G5.7  | rmd-1    | 20 | 10 | No  | cytoplasm       | <i>no predicted function</i>                                                        |
| T05H10.4 |          | 20 | 20 | Yes | nucleus         | <i>no predicted function</i>                                                        |
| T05H10.6 |          | 0  | 20 | No  | mitochondrion   | pyruvate dehydrogenase E1 alpha subunit                                             |
| T06D8.8  | rpn-9    | 35 | 35 | Yes | cytoplasm       | subunit of the 19S regulatory complex of the proteasome                             |
| T06E6.2  | cyb-3    | 5  | 15 | No  | nucleus         | member of the cyclin B family that is required for embryonic viability              |
| T06G6.9  |          | 0  | 20 | No  | cytoplasm       | human VHL binding protein like                                                      |
| T07D4.2  |          | 10 | 20 | No  | cytoplasm       | calcineurin-like metallophosphoesterase                                             |
| T07F10.4 |          | -5 | 25 | No  | plasma membrane | predicted membrane protein                                                          |
| T08B1.1  |          | 0  | 30 | No  | plasma membrane | sugar transporter                                                                   |
| T08D2.1  |          | 35 | 35 | No  | Golgi           | <i>no predicted function</i>                                                        |
| T09A5.11 |          | 20 | 20 | No  | ER              | N-oligosaccharyl transferase 48kd subunit                                           |
| T09D3.3  |          | 0  | 20 | No  | extracellular   | <i>no predicted function</i>                                                        |
| T10B5.5  | cct-7    | 0  | 30 | No  | cytoplasm       | <i>no predicted function</i>                                                        |
| T10B5.6  | knl-3    | 10 | 25 | No  | cytoplasm       | KNL-3 activity is essential for formation of a functional kinetochore               |
| T10B9.8  | cyp-13A1 | 0  | 20 | No  | ER              | cytochrome P450                                                                     |
| T11F8.3  | rme-2    | 0  | 15 | No  | extracellular   | LDL-like receptor                                                                   |
| T11G6.8  |          | 15 | 15 | No  | nucleus         | <i>no predicted function</i>                                                        |
| T12A2.1  |          | 15 | 15 | No  | cytoplasm       | <i>no predicted function</i>                                                        |
| T12B3.2  |          | 20 | 30 | No  | plasma membrane | <i>no predicted function</i>                                                        |
| T13A10.5 | nlp-16   | 0  | 30 | No  | ER              | predicted neuropeptide                                                              |

|            |          |    |     |     |                 |                                                                                                 |
|------------|----------|----|-----|-----|-----------------|-------------------------------------------------------------------------------------------------|
| T13F3.1    | str-183  | 10 | 20  | No  | plasma membrane | 7TM receptor                                                                                    |
| T14B4.3    |          | 10 | 30  | No  |                 | <i>no predicted function</i>                                                                    |
| T14G12.2   | tag-81   | 20 | 0   | No  | plasma membrane | synaptosomal associated protein 25A (SNAP-25A)                                                  |
| T15B7.3    | col-143  | 0  | 20  | No  | extracellular   | cuticle collagen                                                                                |
| T16G1.9    |          | 10 | 20  | No  | extracellular   | <i>no predicted function</i>                                                                    |
| T17H7.4    | gei-16   | 25 | 25  | Yes | nucleus         | protein with similarity to the B20 antigen of the parasitic nematode <i>Onchocerca volvulus</i> |
| T19A5.3    |          | 0  | 20  | No  | nucleus         | <i>no predicted function</i>                                                                    |
| T19B10.2   |          | 0  | 25  | No  |                 | <i>no predicted function</i>                                                                    |
| T20B12.3   |          | 10 | 30  | No  |                 | predicted nucleolar protein involved in ribosome biogenesis                                     |
| T20B3.2    | tni-3    | 0  | 35  | No  | cytoplasm       | troponin I                                                                                      |
| T20D4.19   |          | 20 | 20  | No  |                 | <i>no predicted function</i>                                                                    |
| T20D4.5    |          | -5 | 15  | Yes |                 | <i>no predicted function</i>                                                                    |
| T21B10.2   | enol-1   | 20 | 20  | Yes | cytoplasm       | ortholog of human ENOLASE 1                                                                     |
| T21C9.12   | scpl-4   | 20 | 20  | No  | nucleus         | REV protein (anti-repression transactivator protein)                                            |
| T21D12.12  |          | 0  | 20  | No  | extracellular   | protease inhibitor                                                                              |
| T22D1.10   | ruvb-2   | 20 | -5  | No  | nucleus         | <i>no predicted function</i>                                                                    |
| T22F3.4    | rpl-11.1 | 20 | 35  | No  | cytoplasm       | large ribosomal subunit L11 protein                                                             |
| T22F7.1    |          | 20 | 20  | Yes | plasma membrane | protease inhibitor                                                                              |
| T23B12.7   | dnj-22   | 15 | 15  | No  | nucleus         | encodes a protein containing a DnaJ ('J') domain that is predicted to be mitochondrial          |
| T24D1.1    | sqv-5    | 20 | 20  | No  |                 | chondroitin synthase that both initiates and elongates chondroitin chains                       |
| T24D5.3    |          | 10 | 20  | No  |                 | <i>no predicted function</i>                                                                    |
| T24F1.4    |          | 20 | -10 | No  | extracellular   | <i>no predicted function</i>                                                                    |
| T26A5.8    |          | 20 | 20  | Yes | nucleus         | DNA polymerase epsilon, subunit D                                                               |
| T26E3.7    |          | 10 | 25  | No  | mitochondrion   | ATP synthase alpha and beta subunits                                                            |
| T27C4.4    | lin-40   | 0  | 35  | No  | nucleus         | <i>no predicted function</i>                                                                    |
| T27E9.9    | acc-4    | 0  | 35  | Yes | plasma membrane | ligand-gated ion channel                                                                        |
| T27F2.3    | bir-1    | 20 | 20  | No  | cytoplasm       | homolog of the baculoviral inhibitor-of-apoptosis (IAP) repeat (BIR) proteins (BIRPs) family    |
| VC5.4      | mys-1    | 30 | 30  | No  | nucleus         | MYST acetyltransferase                                                                          |
| VW02B12L.4 | adbp-1   | 20 | 25  | Yes |                 | <i>no predicted function</i>                                                                    |
| W02A2.1    | fat-2    | 0  | 30  | No  | ER              | delta-12 fatty acyl desaturase that increases membrane fluidity                                 |
| W02D7.7    | sel-9    | 10 | 20  | No  | Golgi           | member of p24 family that regulates the transport of lin-12 and glp-1 to the cell surface       |
| W02H5.1    |          | 20 | 20  | No  |                 | <i>no predicted function</i>                                                                    |

|            |          |     |    |     |                 |                                                                                        |
|------------|----------|-----|----|-----|-----------------|----------------------------------------------------------------------------------------|
| W03G1.2    |          | 10  | 20 | No  | nucleus         | <i>no predicted function</i>                                                           |
| W04C9.5    |          | 0   | 35 | No  | plasma membrane | Ras-related GTPase                                                                     |
| W04G3.2    |          | 20  | 20 | Yes |                 | <i>no predicted function</i>                                                           |
| W05E10.1   |          | 0   | 20 | No  | plasma membrane | multidrug resistance protein (major facilitator superfamily MFS-1)                     |
| W05F2.2    |          | 15  | 15 | Yes | cytoplasm       | <i>no predicted function</i>                                                           |
| W05F2.3    |          | 15  | 15 | No  |                 | <i>no predicted function</i>                                                           |
| W06B11.1   |          | -10 | 15 | No  |                 | <i>no predicted function</i>                                                           |
| W06D4.5    | snx-3    | 0   | 15 | No  | cytoplasm       | <i>no predicted function</i>                                                           |
| W06H8.2    |          | 0   | 20 | No  | mitochondrion   | <i>no predicted function</i>                                                           |
| W06H8.4    |          | 0   | 20 | No  |                 | <i>no predicted function</i>                                                           |
| W09C5.1    |          | 15  | 15 | No  | nucleus         | <i>no predicted function</i>                                                           |
| W09C5.2    | unc-59   | 20  | 20 | Yes | cytoplasm       | encodes two septin isoforms required for normal axonal migration                       |
| W09C5.4    | ins-33   | 0   | 30 | No  | extracellular   | insulin-like peptide of the insulin superfamily of proteins                            |
| W09C5.6    | rpl-31   | 15  | 15 | No  | cytoplasm       | ribosomal subunit L31 protein                                                          |
| W09D6.5    |          | 10  | 20 | No  | nucleus         | ortholog of GPI-anchored cell surface glycoprotein                                     |
| W10G6.1    |          | 35  | 35 | No  |                 | uncharacterized protein, contains BRCT, WSN domains and ankyrin repeats                |
| Y102A5C.8  | fbxa-110 | 0   | 30 | No  |                 | protein containing an F-box, a motif predicted to mediate protein-protein interactions |
| Y105E8B.4  | bath-40  | 10  | 20 | No  | nucleus         | <i>no predicted function</i>                                                           |
| Y106G6H.13 |          | 30  | 30 | No  |                 | <i>no predicted function</i>                                                           |
| Y106G6H.3  | rpl-30   | 0   | 30 | No  | cytoplasm       | ribosomal subunit L30 protein                                                          |
| Y106G6H.9  |          | 10  | 30 | No  | cytoplasm       | protein containing an F-box, a motif predicted to mediate protein-protein interactions |
| Y110A7A.13 | chp-1    | 20  | 20 | No  | cytoplasm       | protein containing two CHORD domains that is required for germline development         |
| Y110A7A.8  |          | 10  | 30 | No  |                 | mRNA splicing protein                                                                  |
| Y116A8C.12 | arf-6    | 30  | 30 | No  | cytoplasm       | GTP-binding protein of the ADP-ribosylation factor (ARF) family                        |
| Y116A8C.42 | snr-1    | 20  | 20 | No  | nucleus         | small nuclear ribonucleoprotein Sm D3                                                  |
| Y119D3B.17 | pes-4    | 20  | 20 | No  | nucleus         | encodes a protein that contains two type 1 KH domains                                  |
| Y11D7A.5   |          | 10  | 20 | No  |                 | <i>no predicted function</i>                                                           |
| Y17D7B.4   |          | 10  | 20 | No  |                 | <i>no predicted function</i>                                                           |
| Y17G7B.10  |          | 20  | 20 | No  | cytoplasm       | predicted kinase                                                                       |
| Y17G9B.8   |          | 25  | 25 | No  |                 | <i>no predicted function</i>                                                           |
| Y23H5A.1   | crs-2    | 10  | 30 | No  | cytoplasm       | aminoacyl-tRNA synthetase                                                              |
| Y24D9A.7   |          | 10  | 20 | No  |                 | <i>no predicted function</i>                                                           |

|            |         |    |    |     |                 |                                                                                           |
|------------|---------|----|----|-----|-----------------|-------------------------------------------------------------------------------------------|
| Y24D9A.8   |         | 15 | 10 | No  | cytoplasm       | ortholog of the human gene TRANSALDOLASE 1                                                |
| Y37H9A.6   | ndx-4   | 0  | 15 | Yes | cytoplasm       | homodimeric diadenosine tetraphosphate (Ap(4)A) hydrolase                                 |
| Y38H6C.3   | dct-14  | 10 | 30 | No  |                 | <i>no predicted function</i>                                                              |
| Y39A1A.14  |         | 20 | 0  | No  | nucleus         | protein required for 18S rRNA maturation and 40S ribosome biogenesis                      |
| Y39C12A.1  |         | 25 | 25 | No  | cytoplasm       | SAM domain; Ankyrin repeat                                                                |
| Y40B1A.1   |         | 0  | 20 | No  |                 | <i>no predicted function</i>                                                              |
| Y43H11AL.3 | pqn-85  | 20 | 0  | Yes | nucleus         | protein predicted to contain a glutamine/asparagine (Q/N)-rich ('prion') domain           |
| Y45F10C.4  |         | 10 | 20 | Yes |                 | <i>no predicted function</i>                                                              |
| Y45F3A.3   |         | 20 | 20 | No  | mitochondrion   | very-long-chain acyl-CoA dehydrogenase                                                    |
| Y45G5AM.9  |         | 20 | 20 | No  | nucleus         | <i>no predicted function</i>                                                              |
| Y46H3A.4   |         | 10 | 35 | No  |                 | <i>no predicted function</i>                                                              |
| Y47D7A.1   | skr-7   | 25 | 35 | Yes | nucleus         | homolog of Skp1 in <i>S. cerevisiae</i> that is required for posterior body morphogenesis |
| Y47G6A.24  |         | 0  | 15 | No  |                 | protein required for proper attachment of chromosomes to the mitotic spindle              |
| Y47H9C.5   |         | 0  | 20 | No  | ER              | <i>no predicted function</i>                                                              |
| Y48A6C.2   |         | 10 | 20 | No  |                 | <i>no predicted function</i>                                                              |
| Y48A6C.4   |         | 30 | 20 | No  |                 | ortholog of <i>S. cerevisiae</i> IPI1 that may suppress tumorous growth in the germline   |
| Y48B6A.1   |         | 30 | 10 | No  | nucleus         | ortholog of human BOP1 (overexpressed in colon cancer); may suppress tumorous growth      |
| Y48C3A.14  |         | 10 | 20 | No  | nucleus         | <i>no predicted function</i>                                                              |
| Y49F6B.1   | cyh-1   | 0  | 30 | No  | nucleus         | <i>no predicted function</i>                                                              |
| Y51A2D.7   |         | 25 | -5 | No  |                 | <i>no predicted function</i>                                                              |
| Y51H1A.3   |         | 0  | 30 | No  | mitochondrion   | <i>no predicted function</i>                                                              |
| Y51H4A.22  |         | 10 | 20 | No  | extracellular   | <i>no predicted function</i>                                                              |
| Y51H4A.3   | rho-1   | 20 | 0  | No  | plasma membrane | GTP-binding protein that is a member of the Rho family of GTPases                         |
| Y53C12B.2  |         | 30 | 10 | No  | cytoplasm       | predicted RNA-binding protein Pno1p involved in 26S proteasome assembly                   |
| Y53F4B.14  |         | 20 | 20 | No  |                 | <i>no predicted function</i>                                                              |
| Y53F4B.3   |         | 0  | 20 | No  | nucleus         | transcription factor CBF/NF                                                               |
| Y53G8AR.3  | ral-1   | 5  | 15 | No  | plasma membrane | Ras small GTPase                                                                          |
| Y54E10BR.5 |         | 35 | 35 | No  | ER              | signal peptidase I                                                                        |
| Y54G2A.18  |         | 35 | 35 | No  | Golgi           | B-cell receptor-associated protein 31-like                                                |
| Y54H5A.2   | tag-262 | 10 | 20 | Yes | cytoplasm       | <i>no predicted function</i>                                                              |
| Y54H5A.3   |         | 35 | 0  | Yes | cytoplasm       | RNA-binding protein                                                                       |
| Y55F3C.6   |         | 0  | 30 | No  |                 | <i>no predicted function</i>                                                              |

|            |          |    |    |     |                 |                                                                                          |
|------------|----------|----|----|-----|-----------------|------------------------------------------------------------------------------------------|
| Y56A3A.1   | ntl-3    | 25 | 25 | Yes | nucleus         | ortholog of NOT3/NOT5, a member of a protein complex also predicted to contain ccf-1     |
| Y56A3A.4   | taf-12   | 20 | 20 | No  | nucleus         | homolog of transcription initiation factor TFIID                                         |
| Y57A10A.19 | rsr-2    | 25 | 25 | Yes | nucleus         | splicing coactivator SRm160/300, subunit SRm300                                          |
| Y57G11C.23 |          | 10 | 30 | Yes | plasma membrane | synaptic vesicle transporter                                                             |
| Y58A7A.1   |          | 20 | 20 | No  | plasma membrane | copper transporter                                                                       |
| Y62E10A.13 |          | 0  | 20 | No  | cytoplasm       | <i>no predicted function</i>                                                             |
| Y62F5A.1   | mdt-8    | 25 | 15 | Yes | nucleus         | <i>no predicted function</i>                                                             |
| Y64G10A.5  |          | 25 | 35 | No  |                 | <i>no predicted function</i>                                                             |
| Y65B4A.3   |          | 20 | 0  | No  |                 | <i>no predicted function</i>                                                             |
| Y65B4A.6   |          | 35 | 0  | No  | nucleus         | <i>no predicted function</i>                                                             |
| Y6B3B.9    |          | 20 | 20 | No  |                 | <i>no predicted function</i>                                                             |
| Y71D11A.2  | smr-1    | 0  | 30 | No  | nucleus         | splicing factor SPF30                                                                    |
| Y71F9B.8   |          | 10 | 20 | No  | plasma membrane | <i>no predicted function</i>                                                             |
| Y71H2B.3   | ppfr-3   | 20 | 20 | No  | cytoplasm       | protein phosphatase 2A-associated protein                                                |
| Y73C8C.2   | clec-210 | 20 | 20 | No  | extracellular   | C-type lectin                                                                            |
| Y73F8A.10  |          | 35 | 35 | No  |                 | <i>no predicted function</i>                                                             |
| Y73F8A.22  |          | 0  | 30 | No  |                 | <i>no predicted function</i>                                                             |
| Y79H2A.1   | brp-1    | 20 | 20 | No  | nucleus         | glutamine-rich protein that is conserved in nematodes                                    |
| ZC204.12   |          | 0  | 20 | No  |                 | <i>no predicted function</i>                                                             |
| ZC239.13   |          | 10 | 30 | No  |                 | <i>no predicted function</i>                                                             |
| ZC395.2    | clk-1    | 15 | 15 | No  | cytoplasm       | partially controls lifespan in vivo; it encodes a homolog of the yeast COQ9 protein      |
| ZC443.6    | ugt-16   | 10 | 20 | No  | ER              | UDP-glucuronosyltransferase                                                              |
| ZC477.9    | deb-1    | 0  | 20 | No  | cytoplasm       | muscle attachment protein required for attaching actin filaments to the basal sarcolemma |
| ZC513.4    | vrs-1    | 10 | 25 | No  | cytoplasm       | valyl-tRNA synthetase                                                                    |
| ZK1010.2   |          | 10 | 20 | No  | cytoplasm       | <i>no predicted function</i>                                                             |
| ZK1058.4   | ccdc-47  | 20 | 20 | Yes | nucleus         | <i>no predicted function</i>                                                             |
| ZK1127.7   | cin-4    | 20 | 20 | No  | nucleus         | DNA topoisomerase, type IIA                                                              |
| ZK180.4    |          | 20 | 20 | No  | Golgi           | GTP-binding protein                                                                      |
| ZK185.1    |          | 0  | 20 | No  |                 | <i>no predicted function</i>                                                             |
| ZK39.2     | clec-95  | 10 | 30 | No  | extracellular   | C-type lectin                                                                            |
| ZK418.4    | lin-37   | 10 | 25 | No  |                 | <i>no predicted function</i>                                                             |
| ZK430.7    |          | 20 | 20 | Yes | nucleus         | ribosomal processing protein                                                             |



|          |         |     |    |    |           |                                                                                           |
|----------|---------|-----|----|----|-----------|-------------------------------------------------------------------------------------------|
| ZK430.8  | mlt-7   | 35  | 0  | No | lysosome  | peroxidase                                                                                |
| ZK512.4  |         | 35  | 35 | No | cytoplasm | signal recognition particle 9Kd protein                                                   |
| ZK632.13 | lin-52  | 20  | 20 | No |           | protein that appears to function with lin-35/Rb to negatively regulate vulval development |
| ZK669.1  | tag-341 | 30  | 30 | No | cytoplasm | chimaerin and related Rho GTPase activating proteins                                      |
| ZK809.3  |         | -10 | 20 | No |           | <i>no predicted function</i>                                                              |
| ZK856.11 |         | 20  | 20 | No | nucleus   | <i>no predicted function</i>                                                              |
| ZK899.4  | tba-8   | 25  | 35 | No | cytoplasm | tubulin alpha chain                                                                       |
| ZK899.7  |         | 10  | 20 | No |           | <i>no predicted function</i>                                                              |
